# Supplementary material
Source: PubMed Central journal article supplement (PMC10028535)
Supplement: jamapediatr-e230071-s002.pdf [file jamapediatr-e230071-s002.pdf]

## Data Sharing Statement

Ruppel. Evaluating the Accuracy of Pulse Oximetry in Children According to Race. *JAMA Pediatr*. Published March 20, 2023. doi:10.1001/jamapediatrics.2023.0071

### Data

**Data available:** No

### Additional Information

**Explanation for why data not available:** Data will not be made publicly available, but the authors will consider requests for de-identified data on a case-by-case basis, with satisfactory data-sharing agreements and in accordance with institutional policies.
